# Supplementary material for: Local Passive Heat for the Treatment of Hypertension in Autonomic Failure
Source: PubMed Central journal article supplement — J Am Heart Assoc. 2021 Mar 19;10(7):e018979. doi: 10.1161/JAHA.120.018979 (PMC8174330; doi:10.1161/jaha.120.018979), 2021-03-19
Supplement: JAH3-10-e018979-s001.pdf [file JAH3-10-e018979-s001.pdf]

# **SUPPLEMENTAL MATERIAL**

Figure S1. Acute effect of local passive heat on supine pulse pressure (Protocol 1).

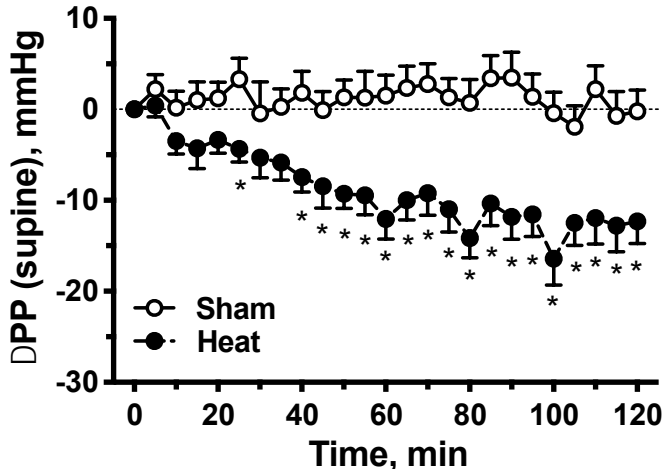

Changes from baseline in pulse pressure ( $\Delta$ PP) during 2 hours of local heat (40-42°C applied over the abdomen and pelvis with an electric heating pad) or sham control. Local passive heat significantly decreased supine PP compared with sham control. Values are expressed as mean  $\pm$ SEM. Overall differences were analyzed by 2-way repeated-measures ANOVA ( $P \leq 0.01$  for treatment effect and treatment\*time interaction). \* $P < 0.001$  versus sham or placebo, adjusted for multiple comparisons using Bonferroni correction.

**Figure S2. Effects of overnight heat therapy on nighttime blood pressure (Protocol 2).**

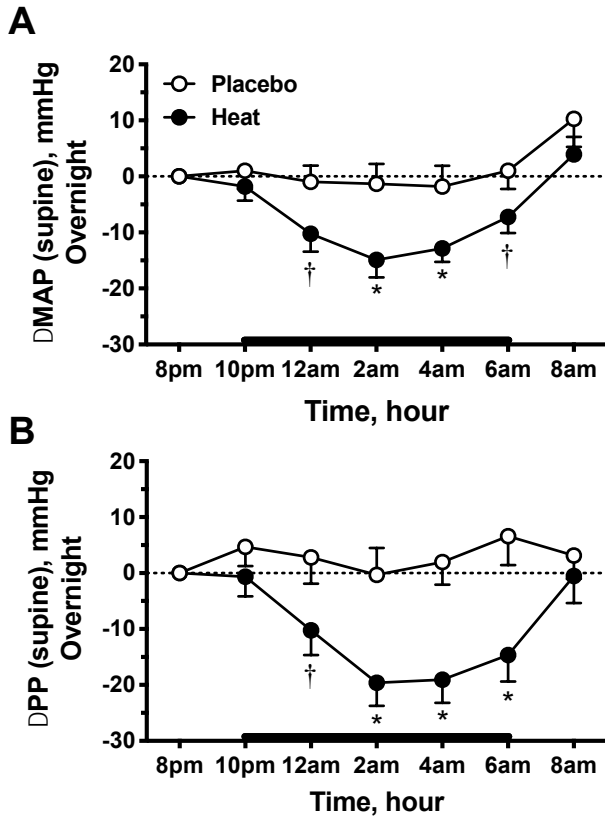

Changes from baseline (8 PM) in supine mean arterial pressure ( $\Delta$ MAP, **A**) and PP ( $\Delta$ PP, **B**) in autonomic failure patients with nocturnal supine hypertension. Passive heat (38°C) was applied with a water-perfused heating pad placed under the patient's torso and proximal thighs from 10 PM-6 AM (bold line). Overnight heat therapy significantly decreased supine MAP and PP compared with placebo. Values are expressed as mean $\pm$ SEM. Overall differences were analyzed by 2-way repeated-measures ANOVA ( $P=0.038$  for treatment effect and  $P=0.029$  for treatment\*time interaction in Panel A;  $P\leq 0.01$  for treatment effect and treatment\*time interaction in Panel B). \* $P<0.001$  and † $P<0.05$  versus sham or placebo, adjusted for multiple comparisons using Bonferroni correction.
